# Supplementary material for: Genome-wide association of yield traits in a nested association mapping population of barley reveals new gene diversity for future breeding
Source: PubMed Central journal article supplement (PMC6054221; doi:10.1093/jxb/ery178), 2018-05-15
Supplement: ery178_suppl_supplementary_figures_s1-s22.pdf [file ery178_suppl_supplementary_figures_s1-s22.pdf]

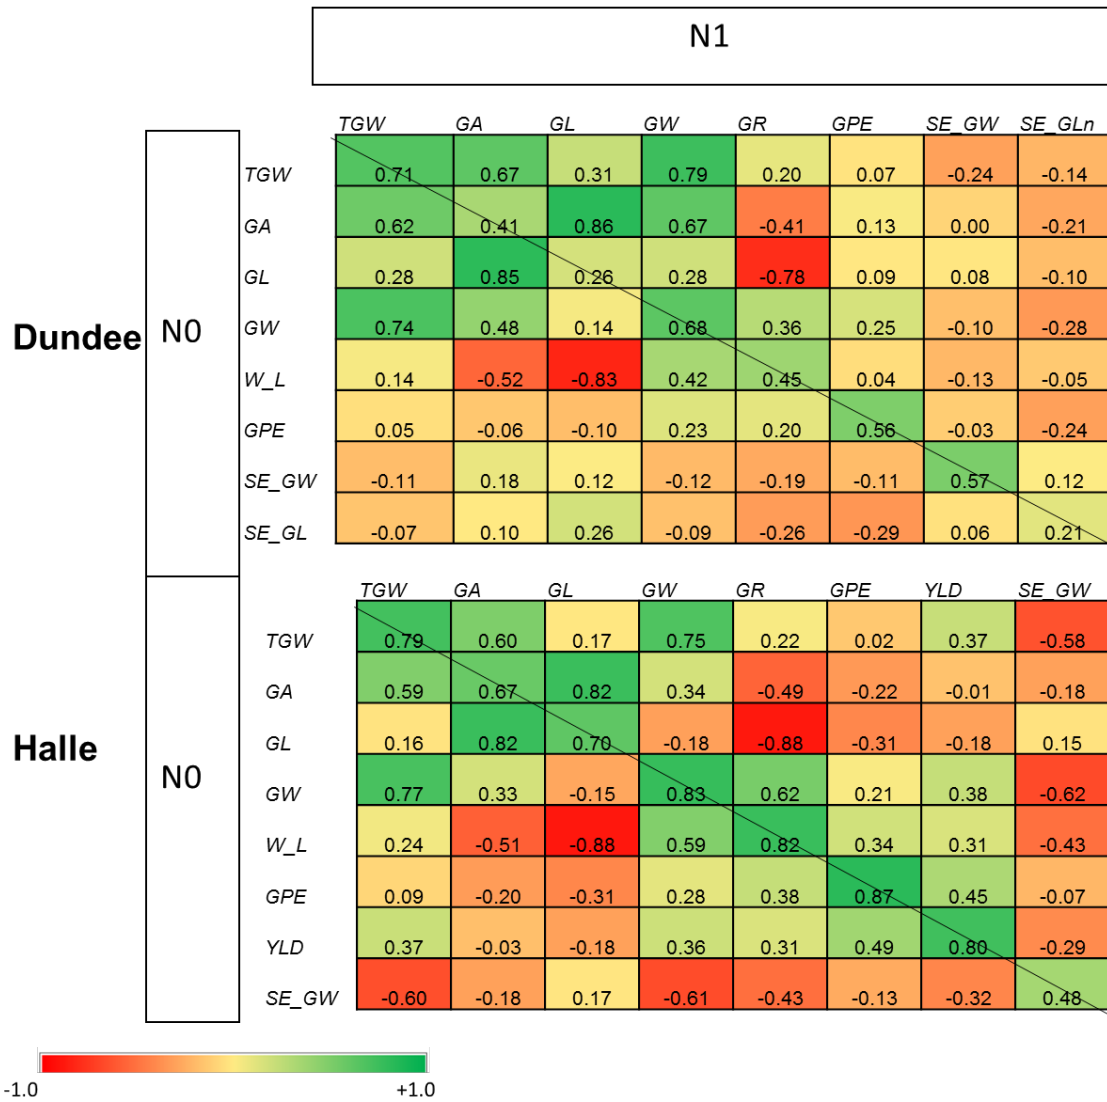

**Figure S1: Correlation matrix of the yield traits across locations and treatments.** Red = negative correlation, green = positive correlation. Correlations between the treatments are shown diagonally.

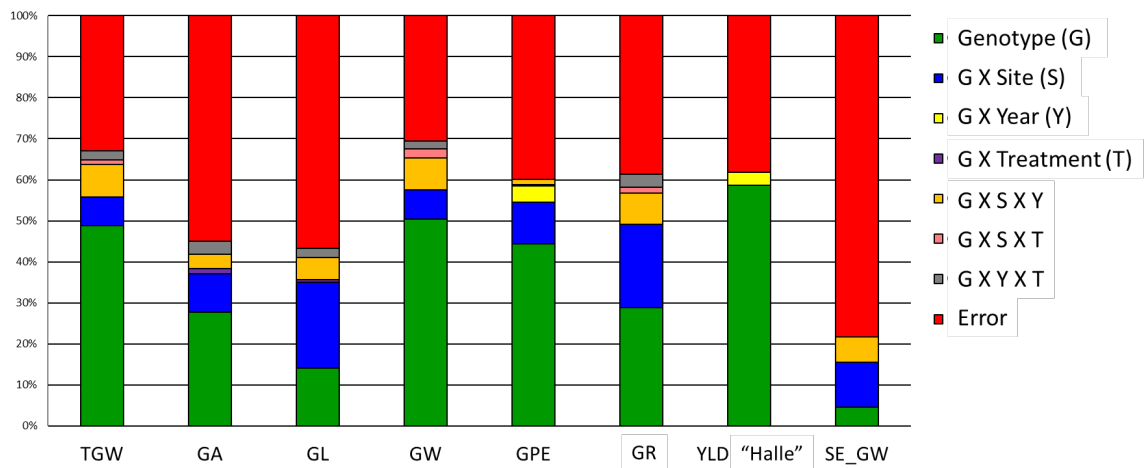

Figure S2: Variance components of the yield traits displayed in percentages.

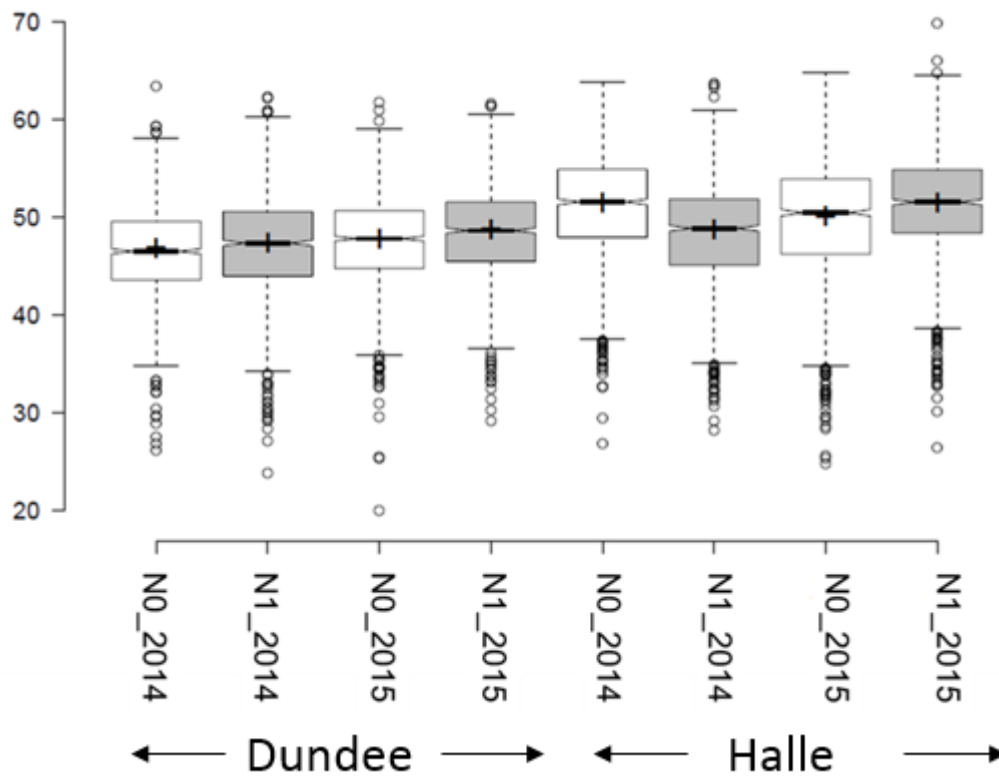

Figure S3: Box plot of thousand grain weight (TGW in grams).

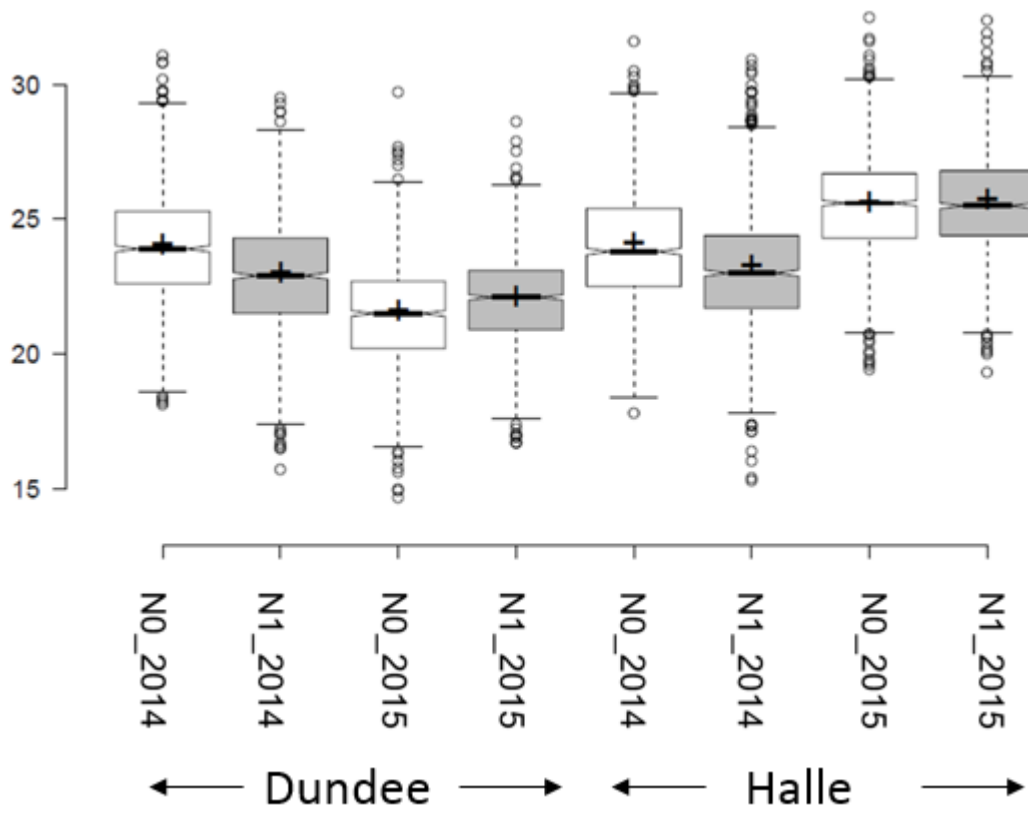

Figure S4: Box plot of grain area (GA in mm<sup>2</sup>).

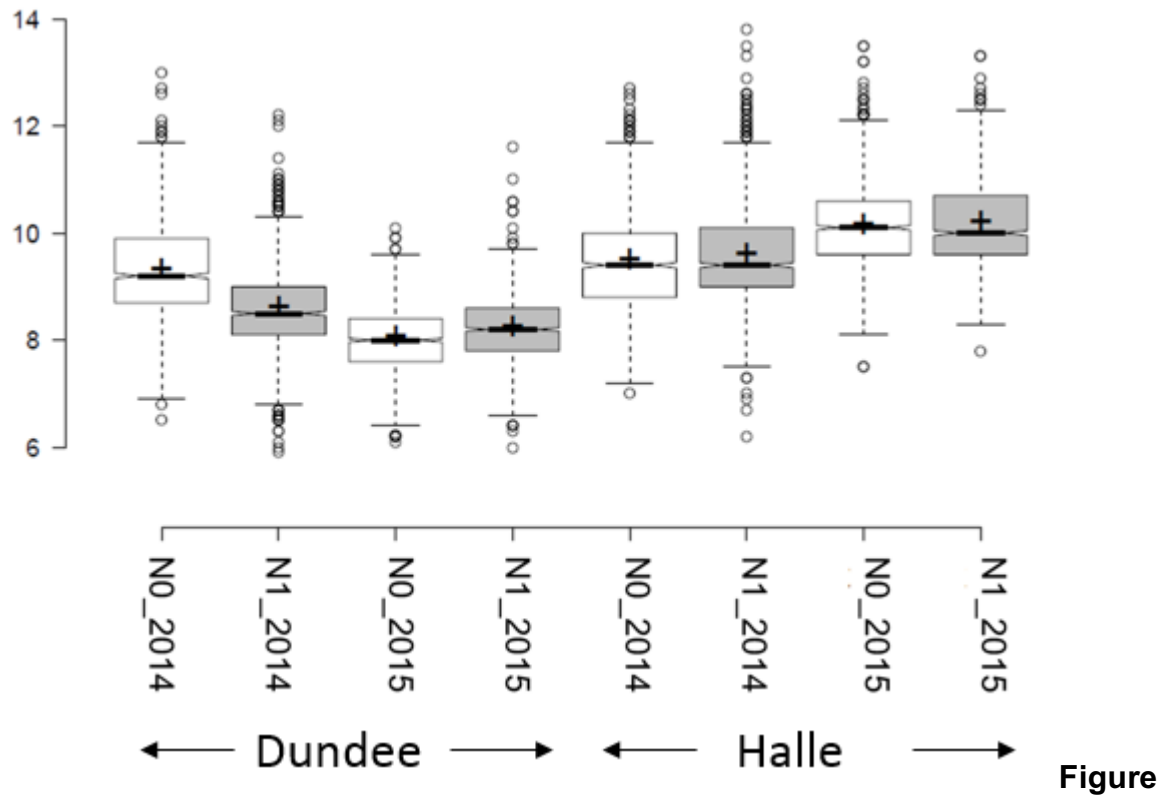

S5: Box plot of grain length (GL in mm).

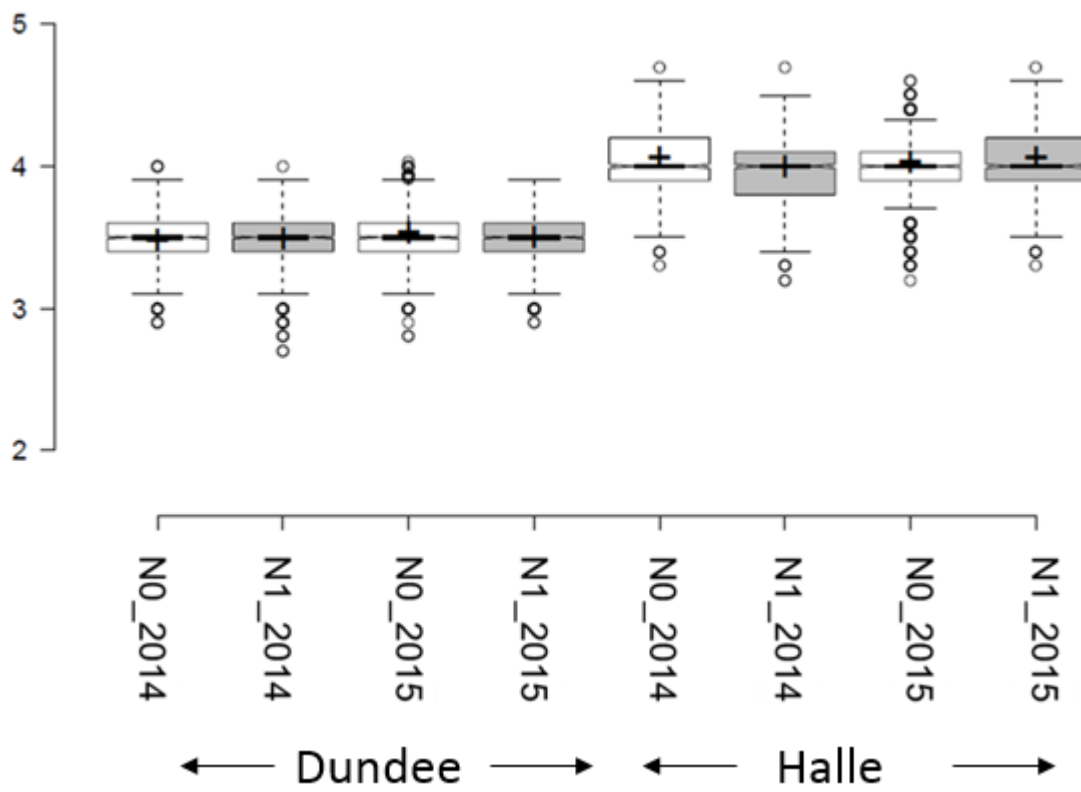

Figure S6: Box plot of grain width (GW in mm).

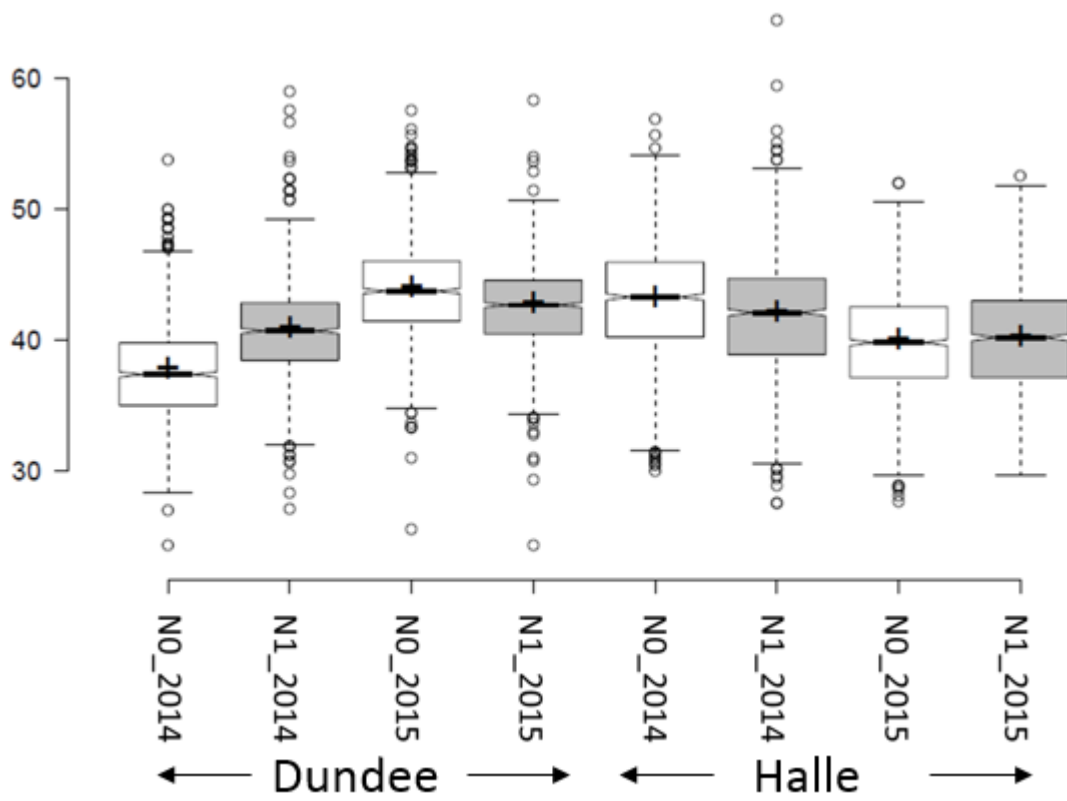

Figure S7: Box plot of grain roundness (width and grain length ratio in %) (GR).

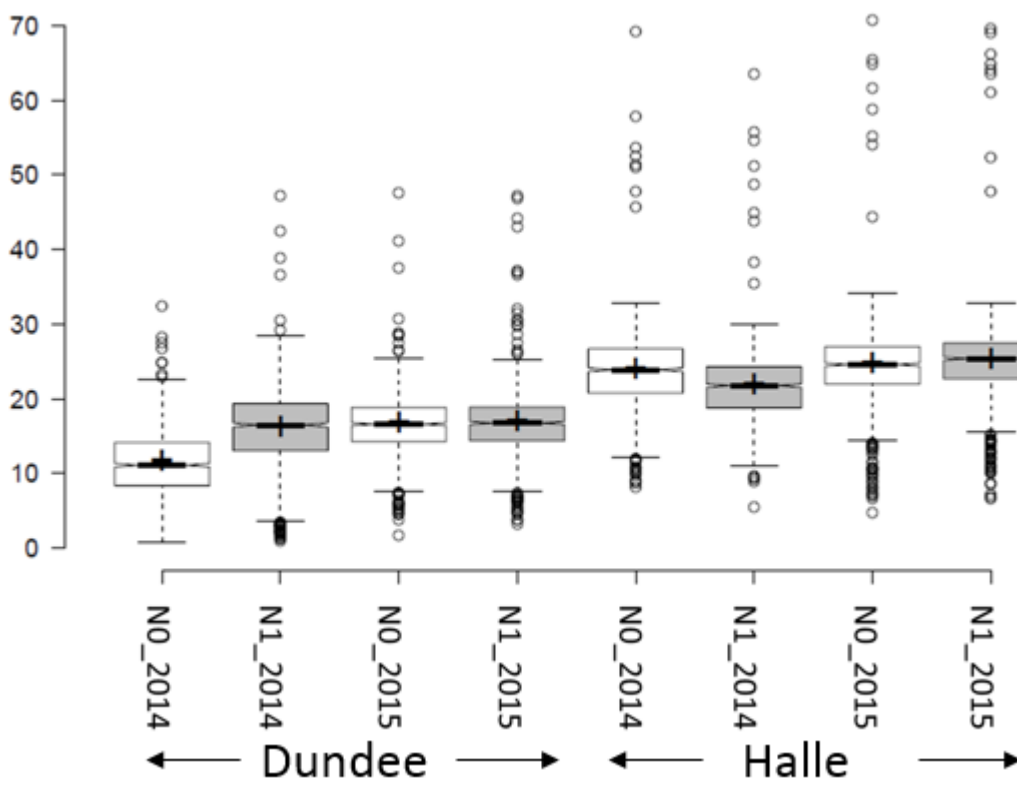

Figure S8: Box plot of grains per ear (GPE in number).

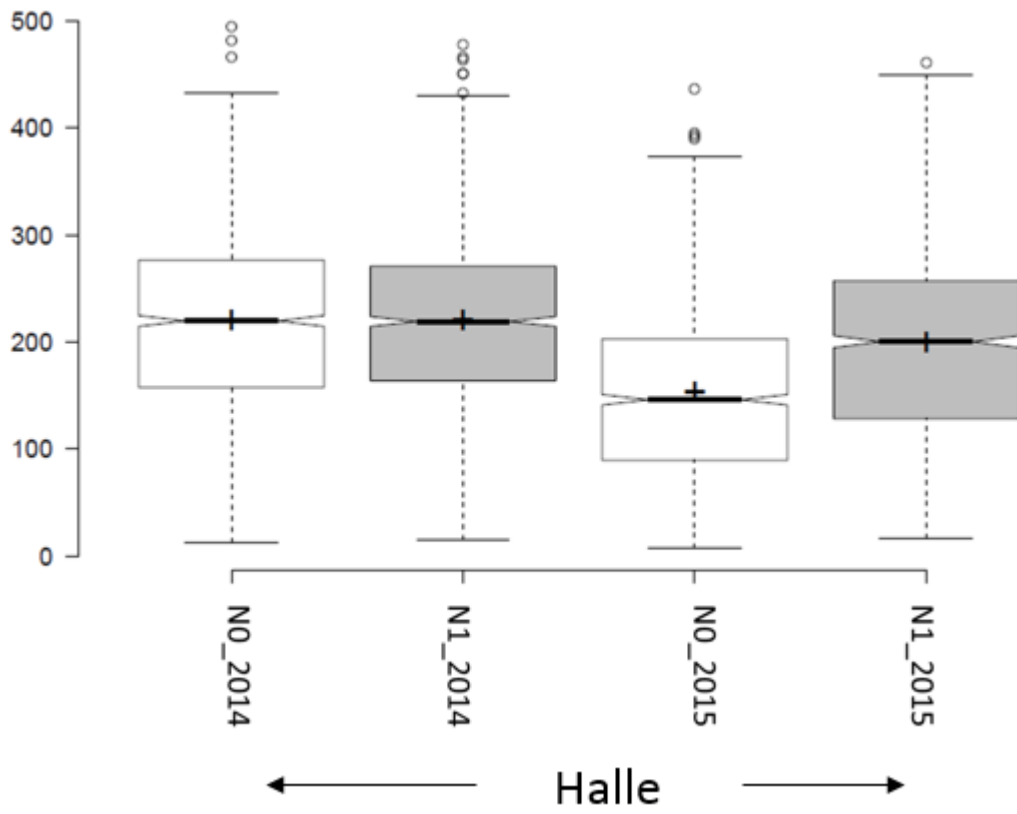

Figure S9: Box plot of yield (YLD in grams, only from Halle).

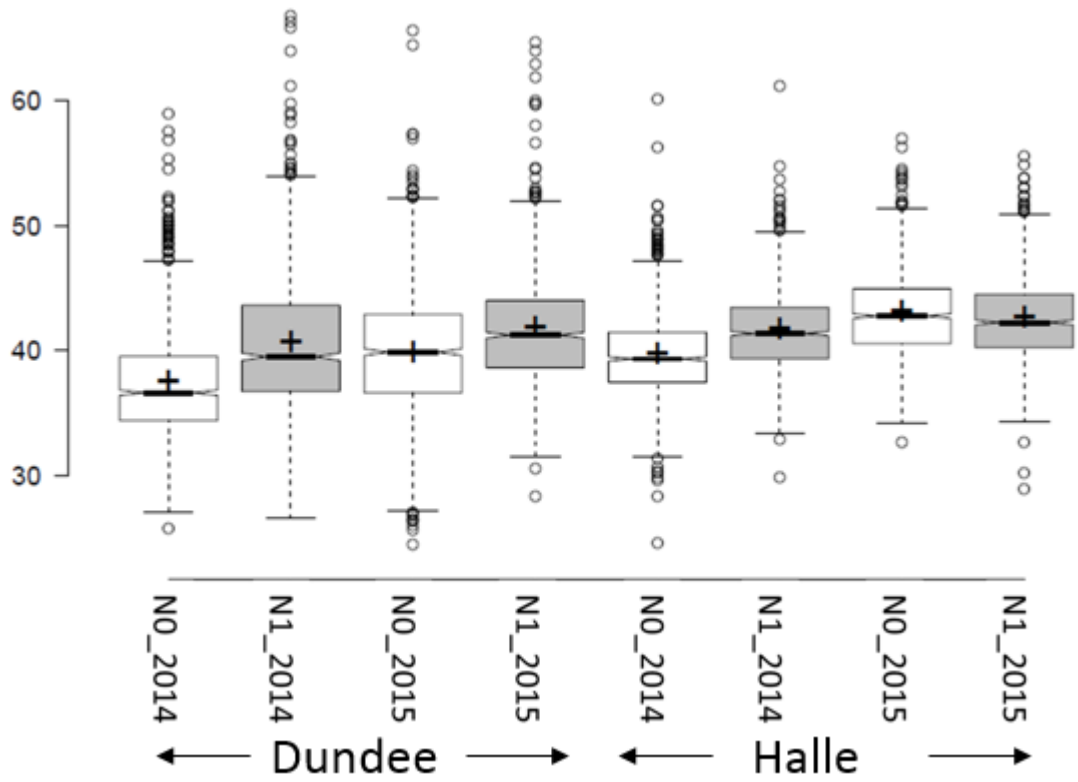

Figure

**S10: Box plot of standard error of grain width (SE\_GW). To ease displaying, values are multiplied by 10.**

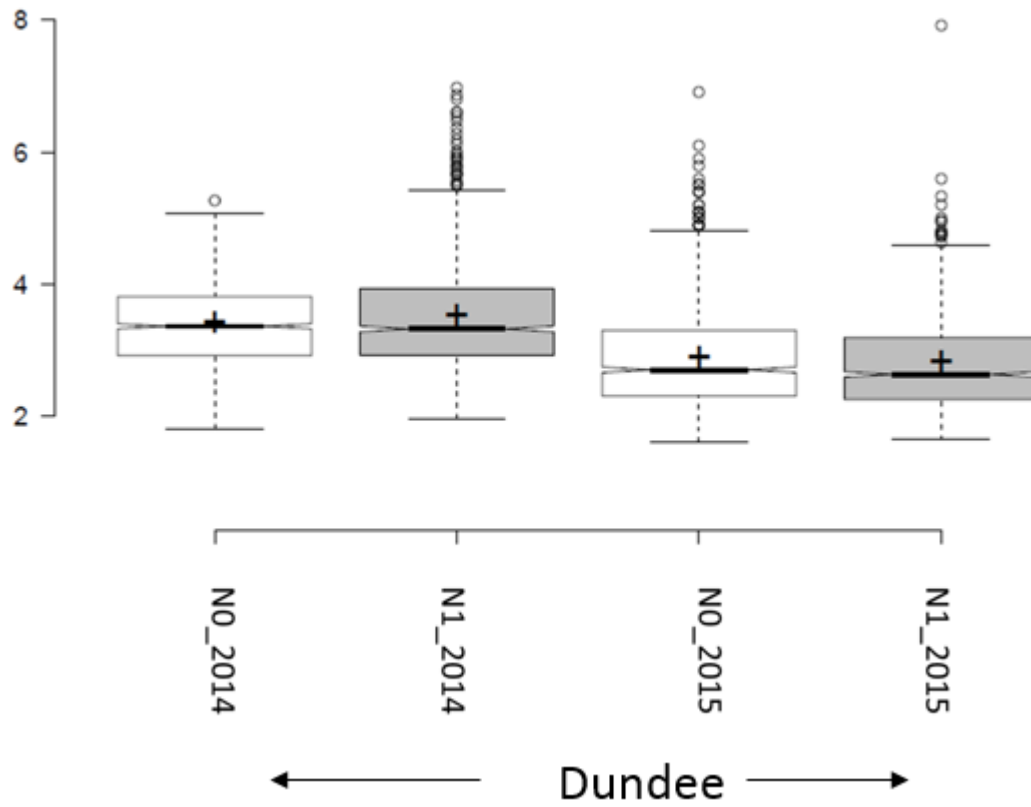

Figure

S11: Box plot of standard error of grain length (SE\_GL only from Dundee). To ease displaying, values are multiplied by 10.



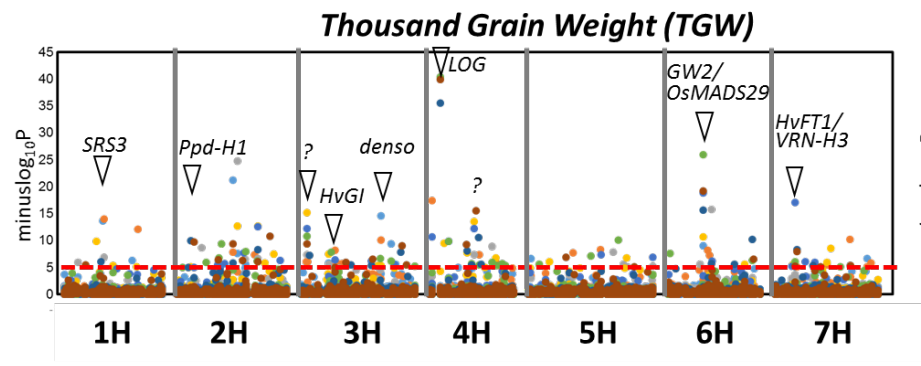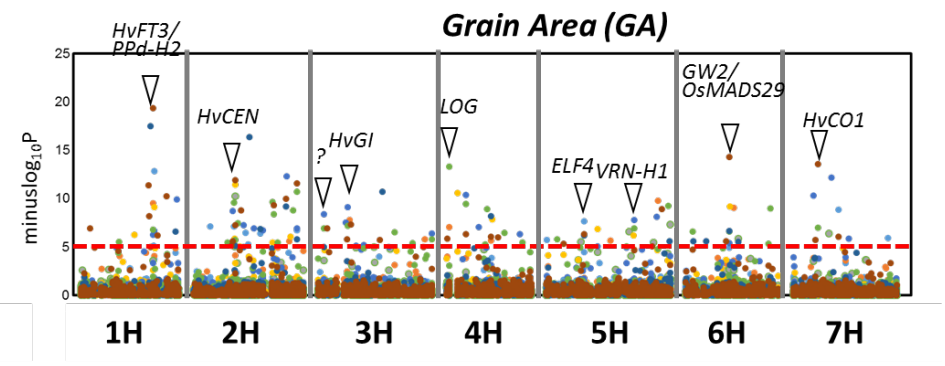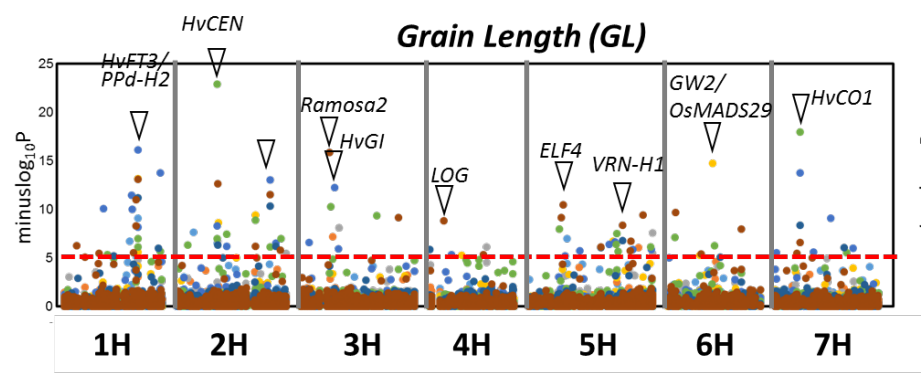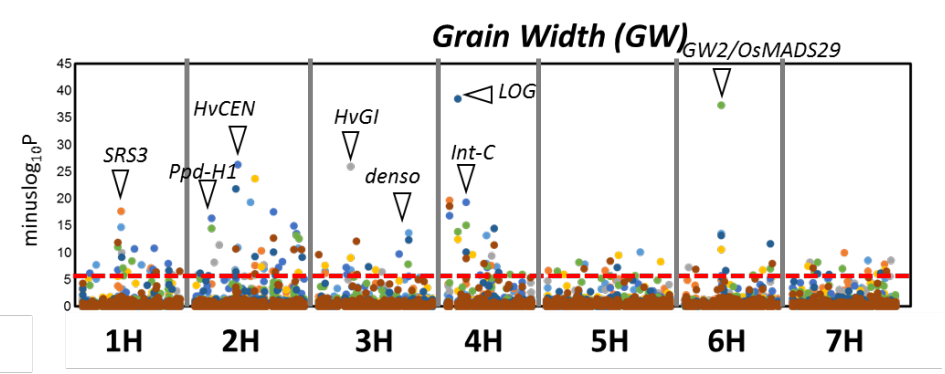

|                |   |
|----------------|---|
| Dundee_2014_N0 | ● |
| Dundee_2014_N1 | ● |
| Dundee_2015_N0 | ● |
| Dundee_2015_N1 | ● |

|               |   |
|---------------|---|
| Halle_2014_N0 | ● |
| Halle_2014_N1 | ● |
| Halle_2015_N0 | ● |
| Halle_2015_N1 | ● |

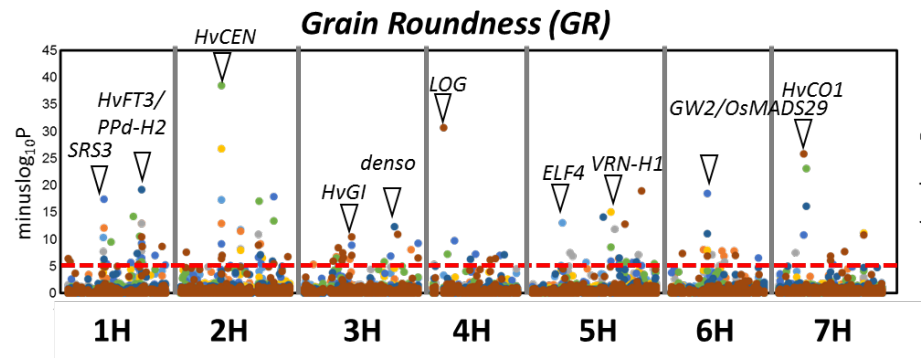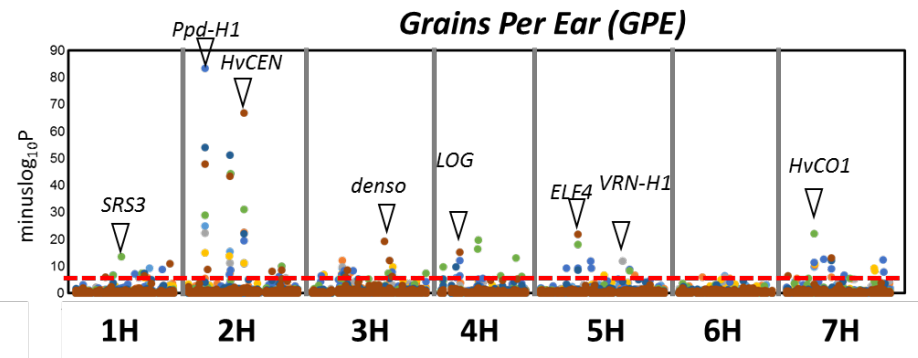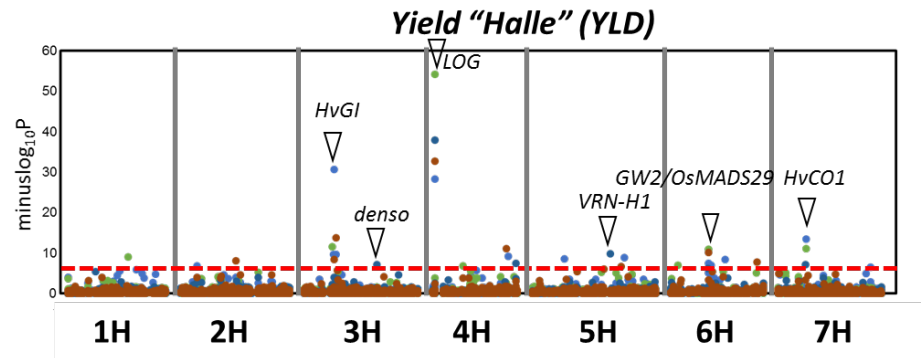

|                |   |
|----------------|---|
| Dundee_2014_N0 | ● |
| Dundee_2014_N1 | ● |
| Dundee_2015_N0 | ● |
| Dundee_2015_N1 | ● |

|               |   |
|---------------|---|
| Halle_2014_N0 | ● |
| Halle_2014_N1 | ● |
| Halle_2015_N0 | ● |
| Halle_2015_N1 | ● |

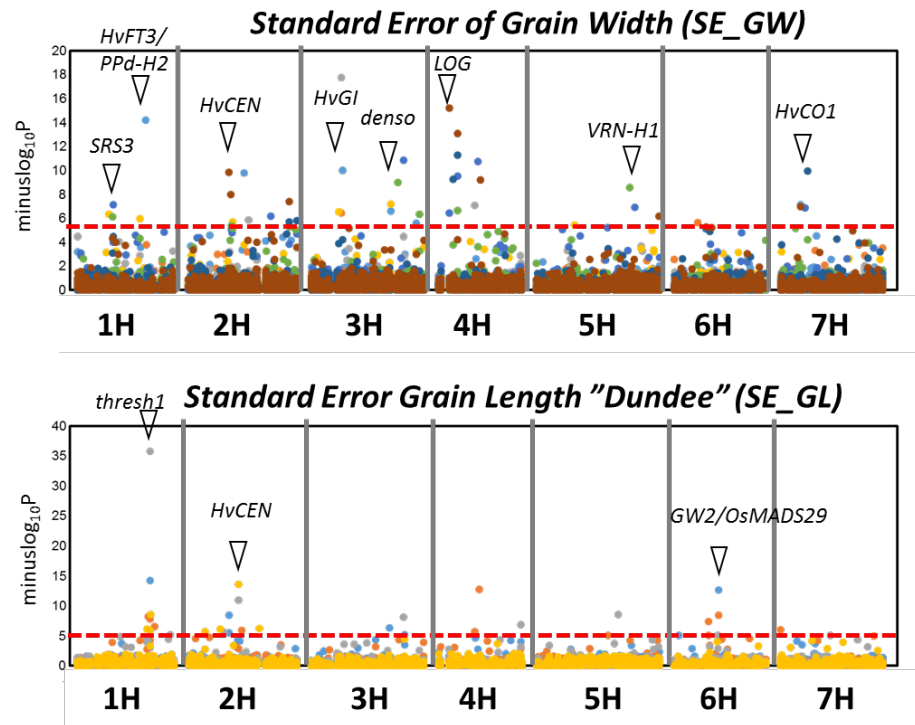

|                |   |
|----------------|---|
| Dundee_2014_N0 | ● |
| Dundee_2014_N1 | ● |
| Dundee_2015_N0 | ● |
| Dundee_2015_N1 | ● |

|               |   |
|---------------|---|
| Halle_2014_N0 | ● |
| Halle_2014_N1 | ● |
| Halle_2015_N0 | ● |
| Halle_2015_N1 | ● |

**Figure S12: Genome-wide association scans of yield traits.**

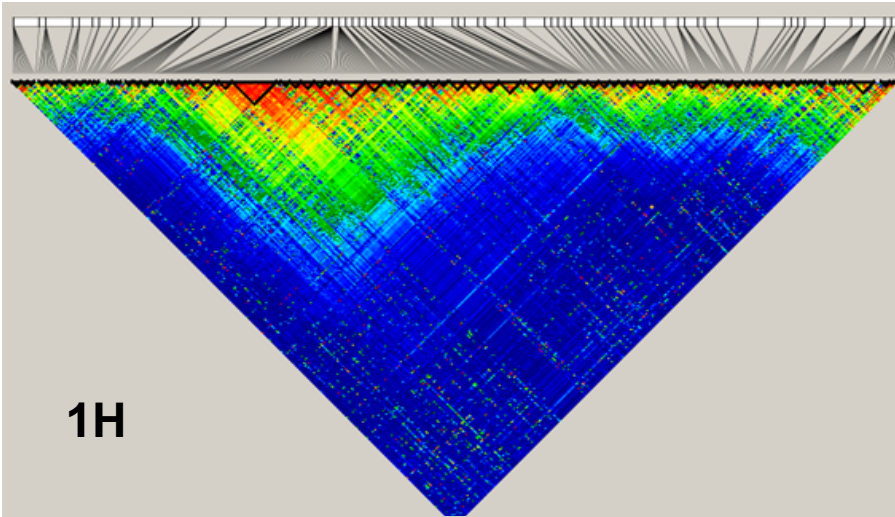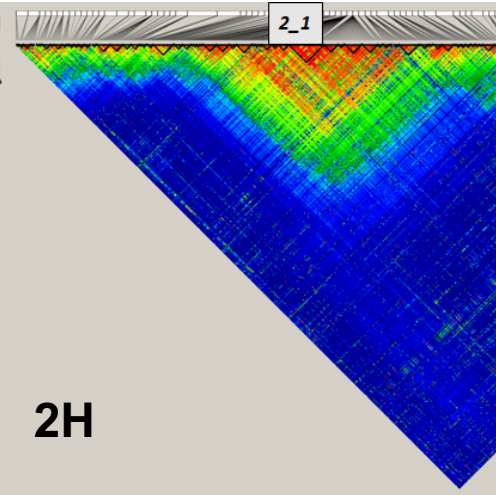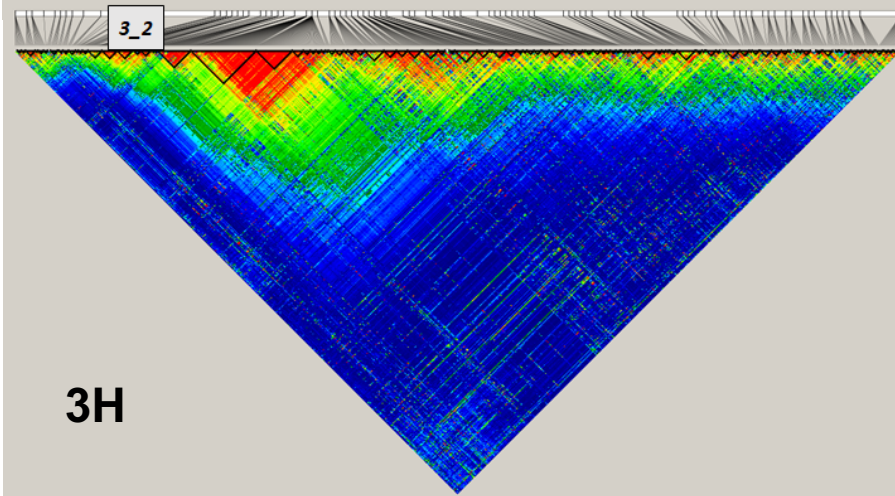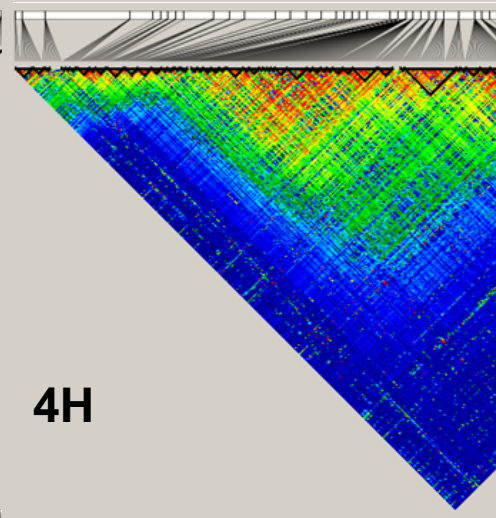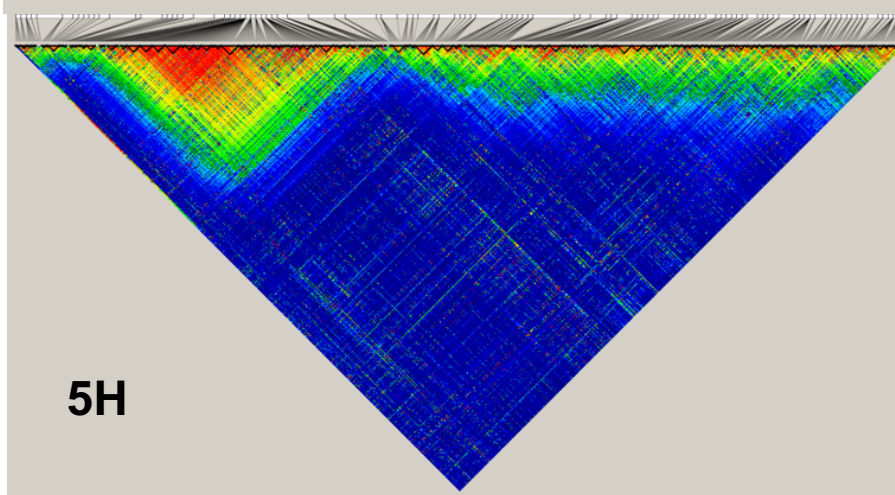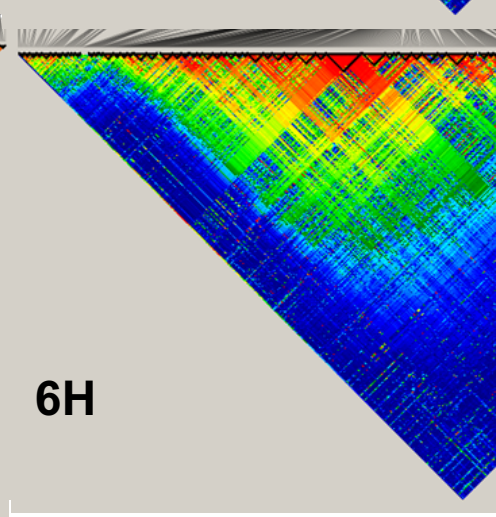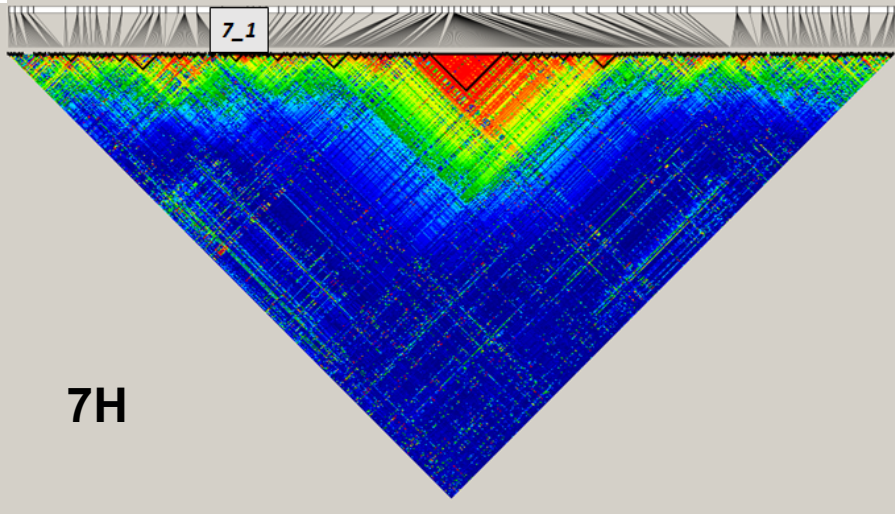

**Figure S13: LD of mapped SNP markers in HEB-25 population. The plot uses a GOLD heatmap color scheme implimented in Haploview 4.2. Blocks of LD based on the Solidspine aloragithm of Haploview4.2 are indicated as black outlines. The four QTL-hotspots discussed here are shown on chromosomes 2H, 3H and 7H.**

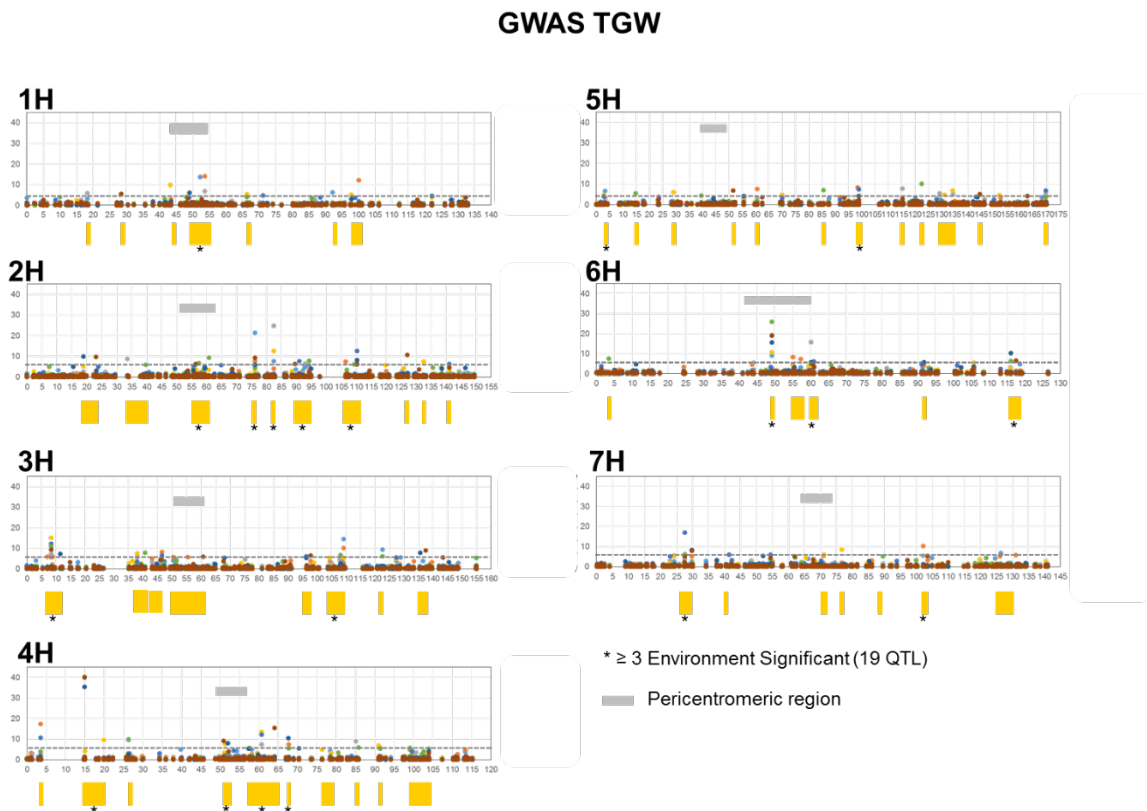

**Figure S14: Distribution of thousand grain weight (TGW) QTLs across barley chromosomes.**

## GWAS GA

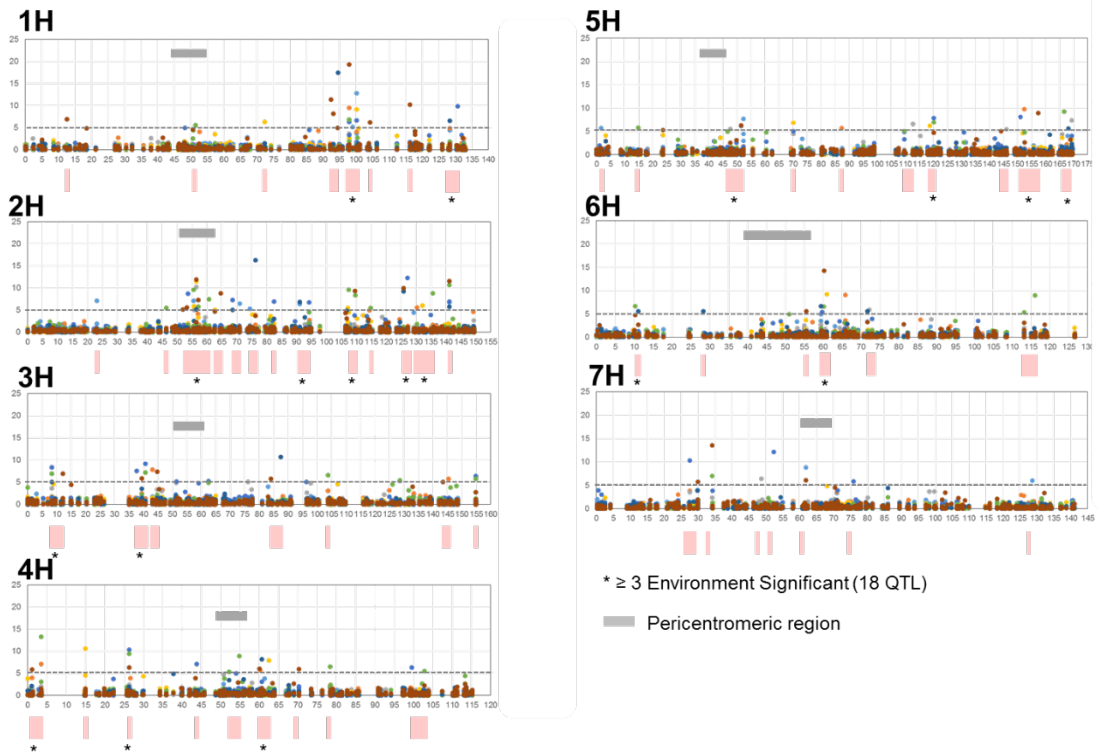

Figure S15: Distribution of grain area (GA) QTLs across barley chromosomes.

## GWAS GL

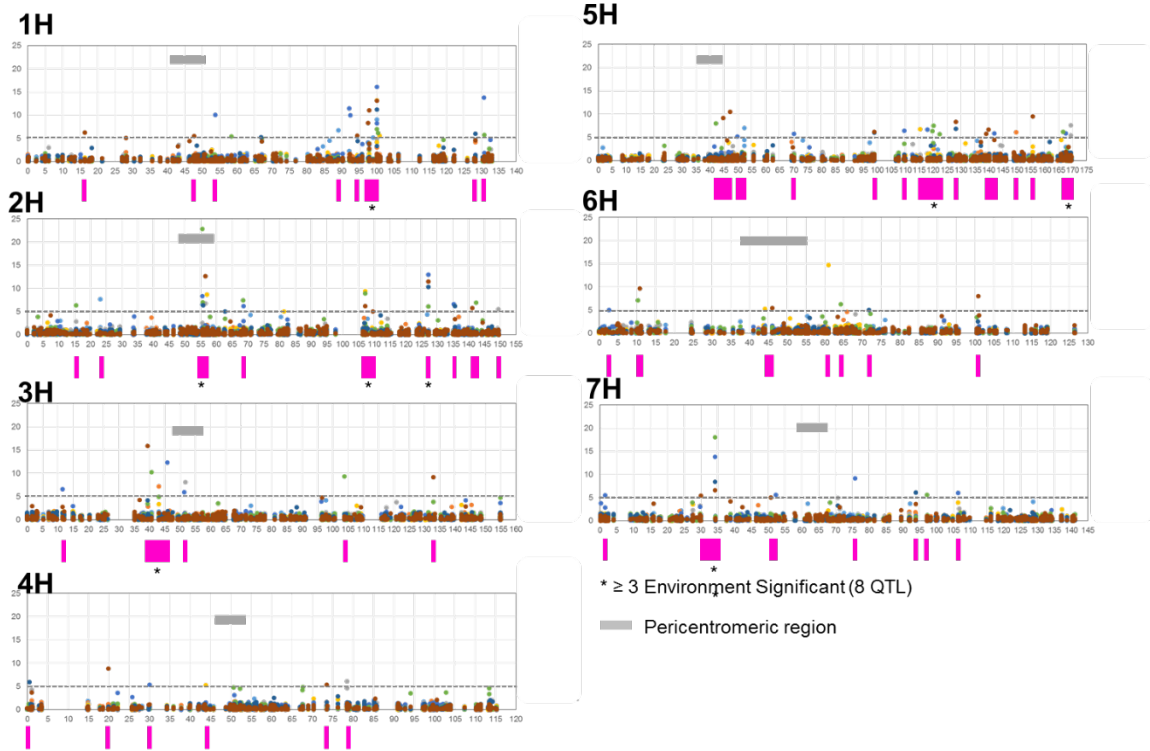

Figure S16: Distribution of grain length (GL) QTLs across barley chromosomes.

## GWAS GW

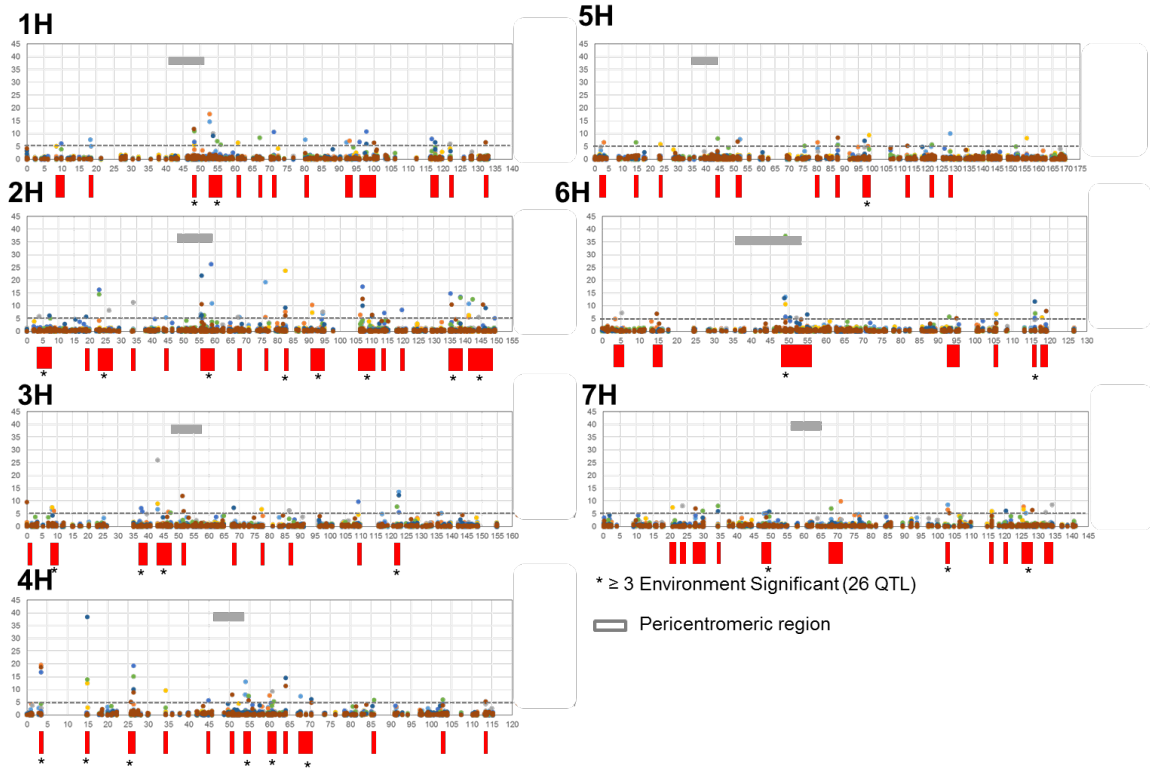

Figure S17: Distribution of grain width (GW) QTLs across barley chromosomes.



## GWAS GPE

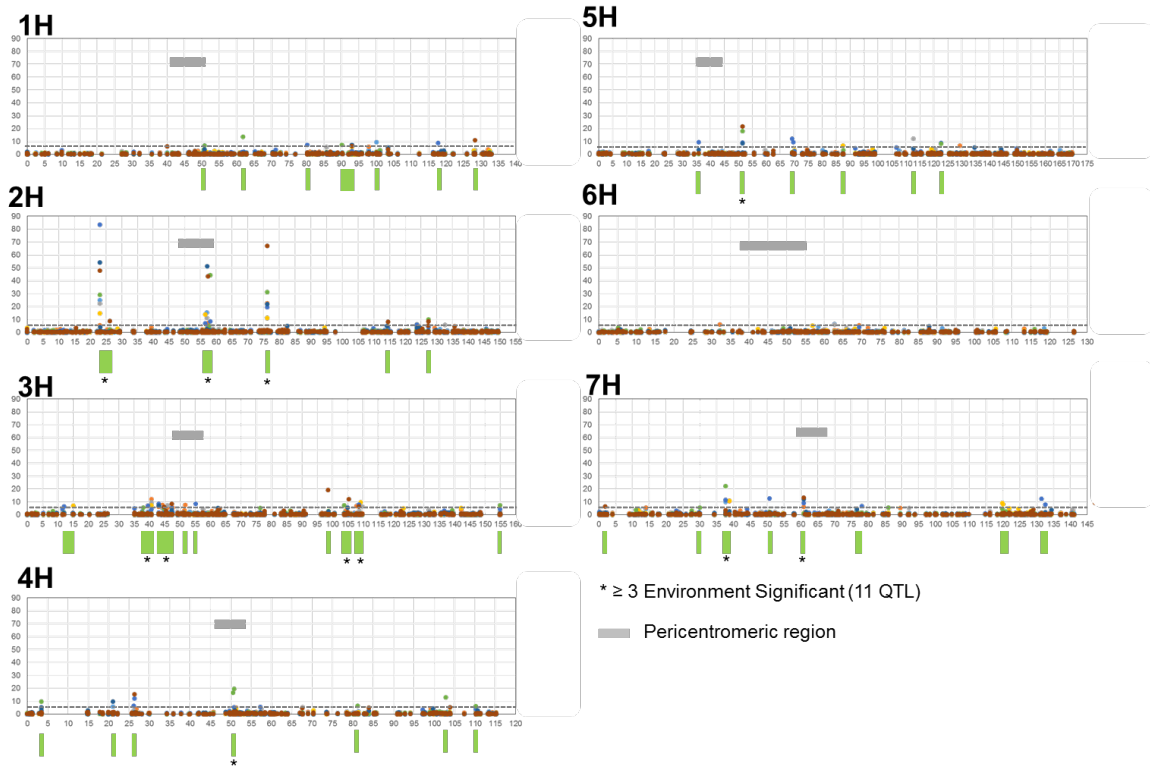

**Figure S18: Distribution of grains per ear (GPE) QTLs across barley chromosomes.**

## GWAS GR

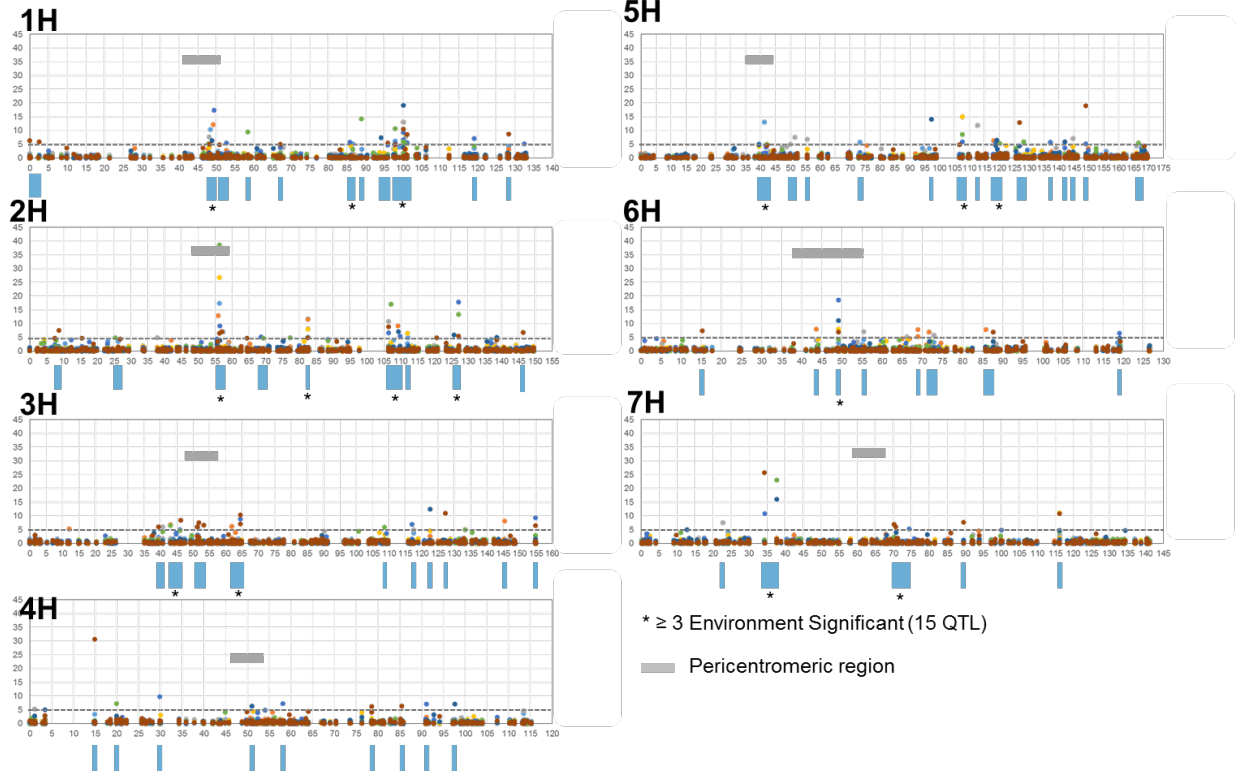

Figure S19: Distribution of grain roundness (GR) QTLs across barley chromosomes.

## GWAS YLD "Halle"

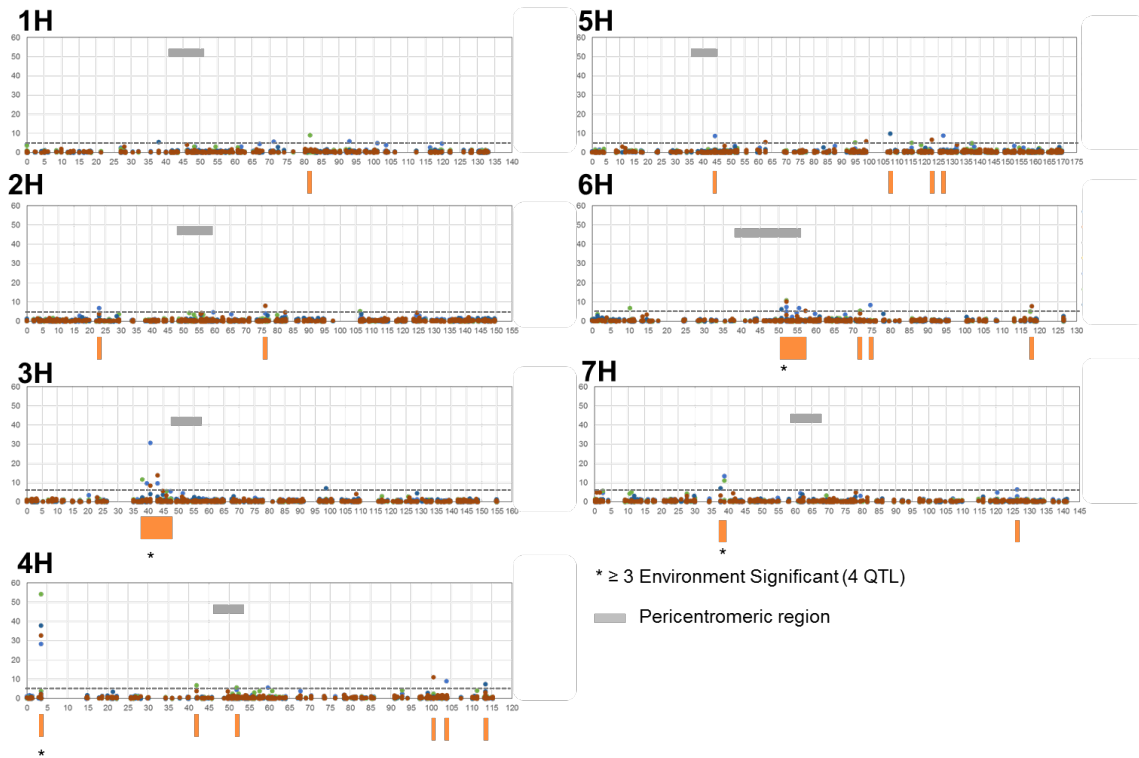

**Figure S20: Distribution of grain yield (YLD) QTLs from Halle across barley chromosomes.**

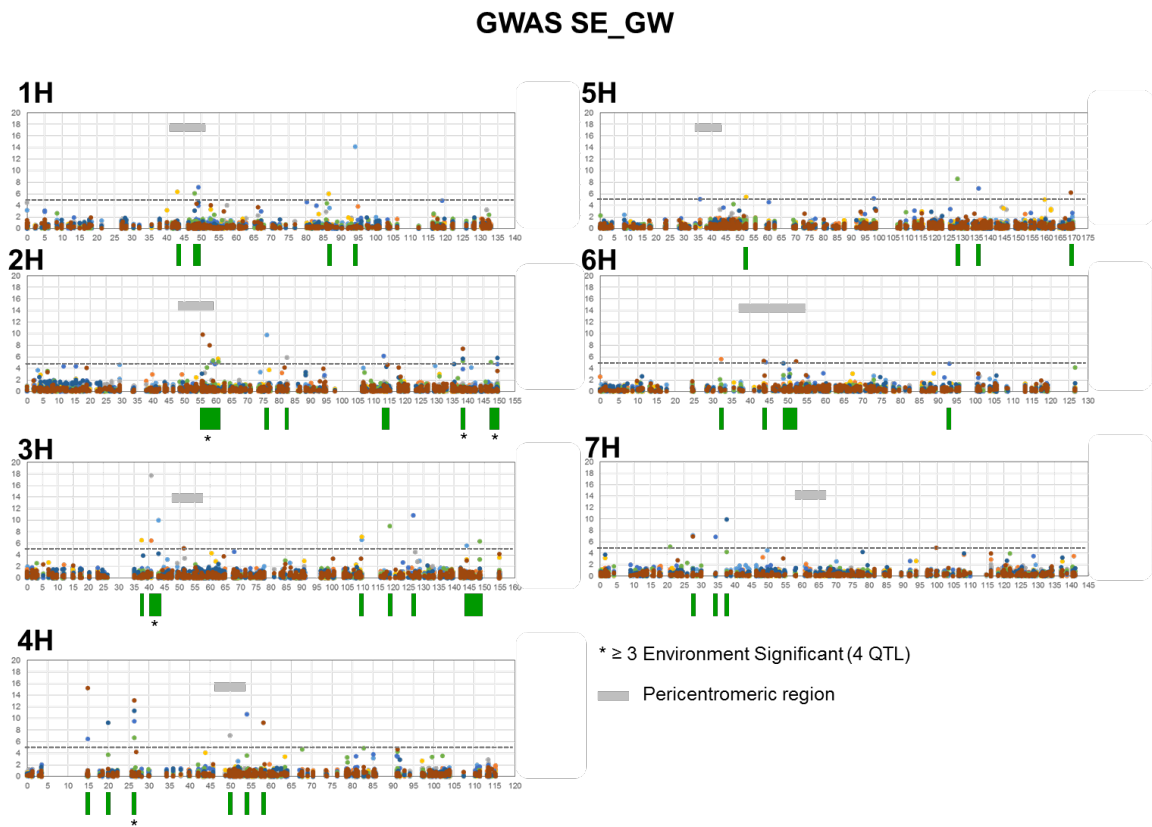

**Figure S21: Distribution of standard error of grain width (SE\_GW) QTLs across barley chromosomes.**

## GWAS SE\_GL

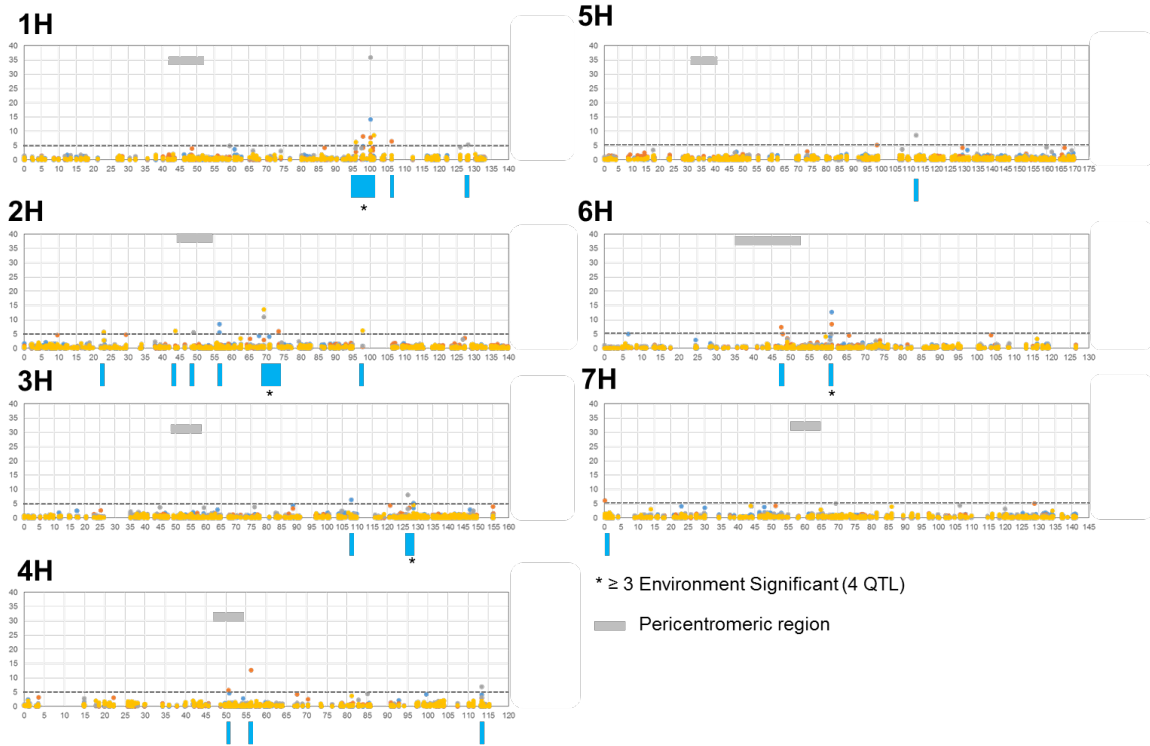

**Figure S22: Distribution of standard error of grain length (SE\_GL) QTLs across barley chromosomes.**
